# Supplementary material
Source: publisher figshare collection journal article supplement (https://springernature.figshare.com/ndownloader/files/17562797)
Supplement: Supplementary file [file 17562797]

# LONGEVITY REGULATING PATHWAY - MULTIPLE SPECIES

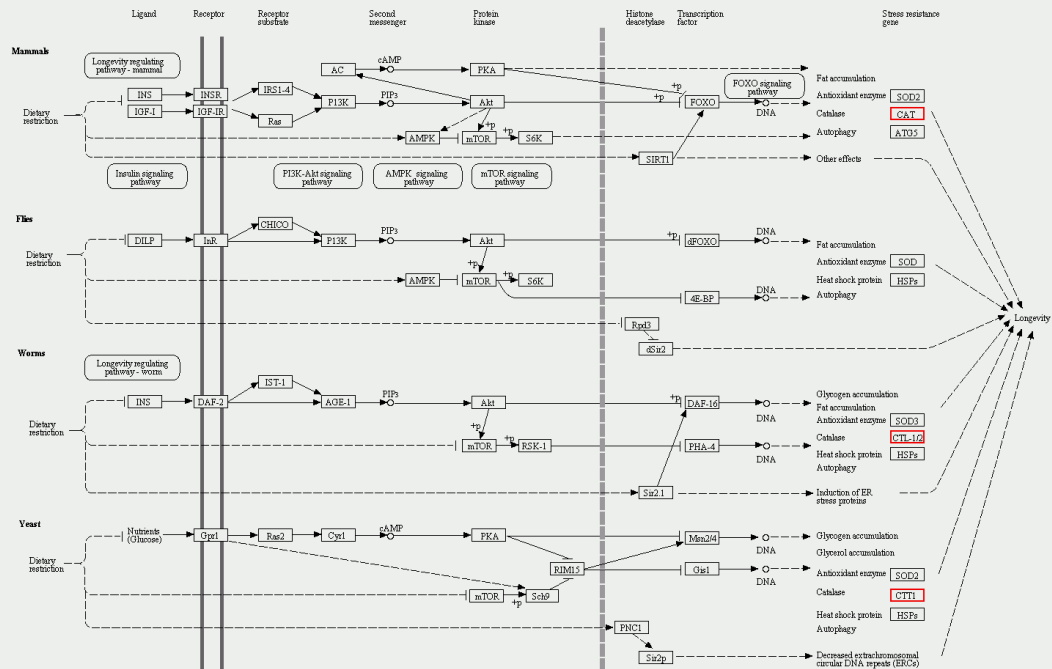

04213 3/016  
(c) Kazuhisa Laboratories

**Additional files 11** Our KEGG pathway analysis showed that the CAT gene, as a downstream gene in longevity regulating pathway, directly cause longevity. The expression of CAT was suppressed by Ras-P13k-Akt-FOXO pathway in an uncomfortable environment.
